# Supplementary material for: The GATA Transcription Factor Gaf1 Represses tRNAs, Inhibits Growth, and Extends Chronological Lifespan Downstream of Fission Yeast TORC1
Source: PubMed Central journal article supplement (PMC7068653; doi:10.1016/j.celrep.2020.02.058), 2020-03-10
Supplement: mmc1.pdf [file mmc1.pdf]

**Cell Reports, Volume 30**

**Supplemental Information**

**The GATA Transcription Factor Gaf1 Represses  
tRNAs, Inhibits Growth, and Extends Chronological  
Lifespan Downstream of Fission Yeast TORC1**

**María Rodríguez-López, Suam Gonzalez, Olivia Hillson, Edward Tunnacliffe, Sandra  
Codlin, Victor A. Tallada, Jürg Bähler, and Charalampos Rallis**



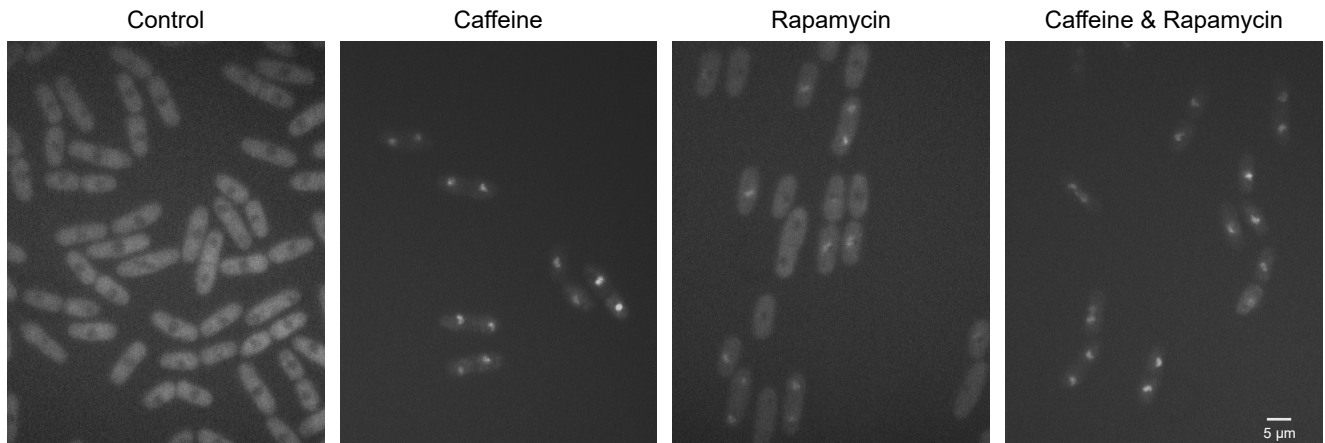

**Figure S2. Fluorescence microscopy of cells expressing GFP-tagged Gaf1, Related to Figure 3.**

Cells were grown in YES liquid medium to mid-exponential phase ( $OD_{600} = 0.5$ ), when caffeine (10 mM), rapamycin (100 ng/ml), or both drugs combined at same doses were added, and cells were incubated with shaking at 32°C for 30 minutes. Control cells were not exposed to the drugs but otherwise treated the same. Cells were photographed in a Zeiss Axioskop microscope using the Volocity software. All cells showed nuclear localization of Gaf1 after treatment with caffeine or with both drugs; the nuclear translocation of Gaf1 was less efficient in cells treated with rapamycin only, reflecting that rapamycin alone only partially inhibits TORC1 in *S. pombe* (Rallis et al., 2013).

GO: Biological Process

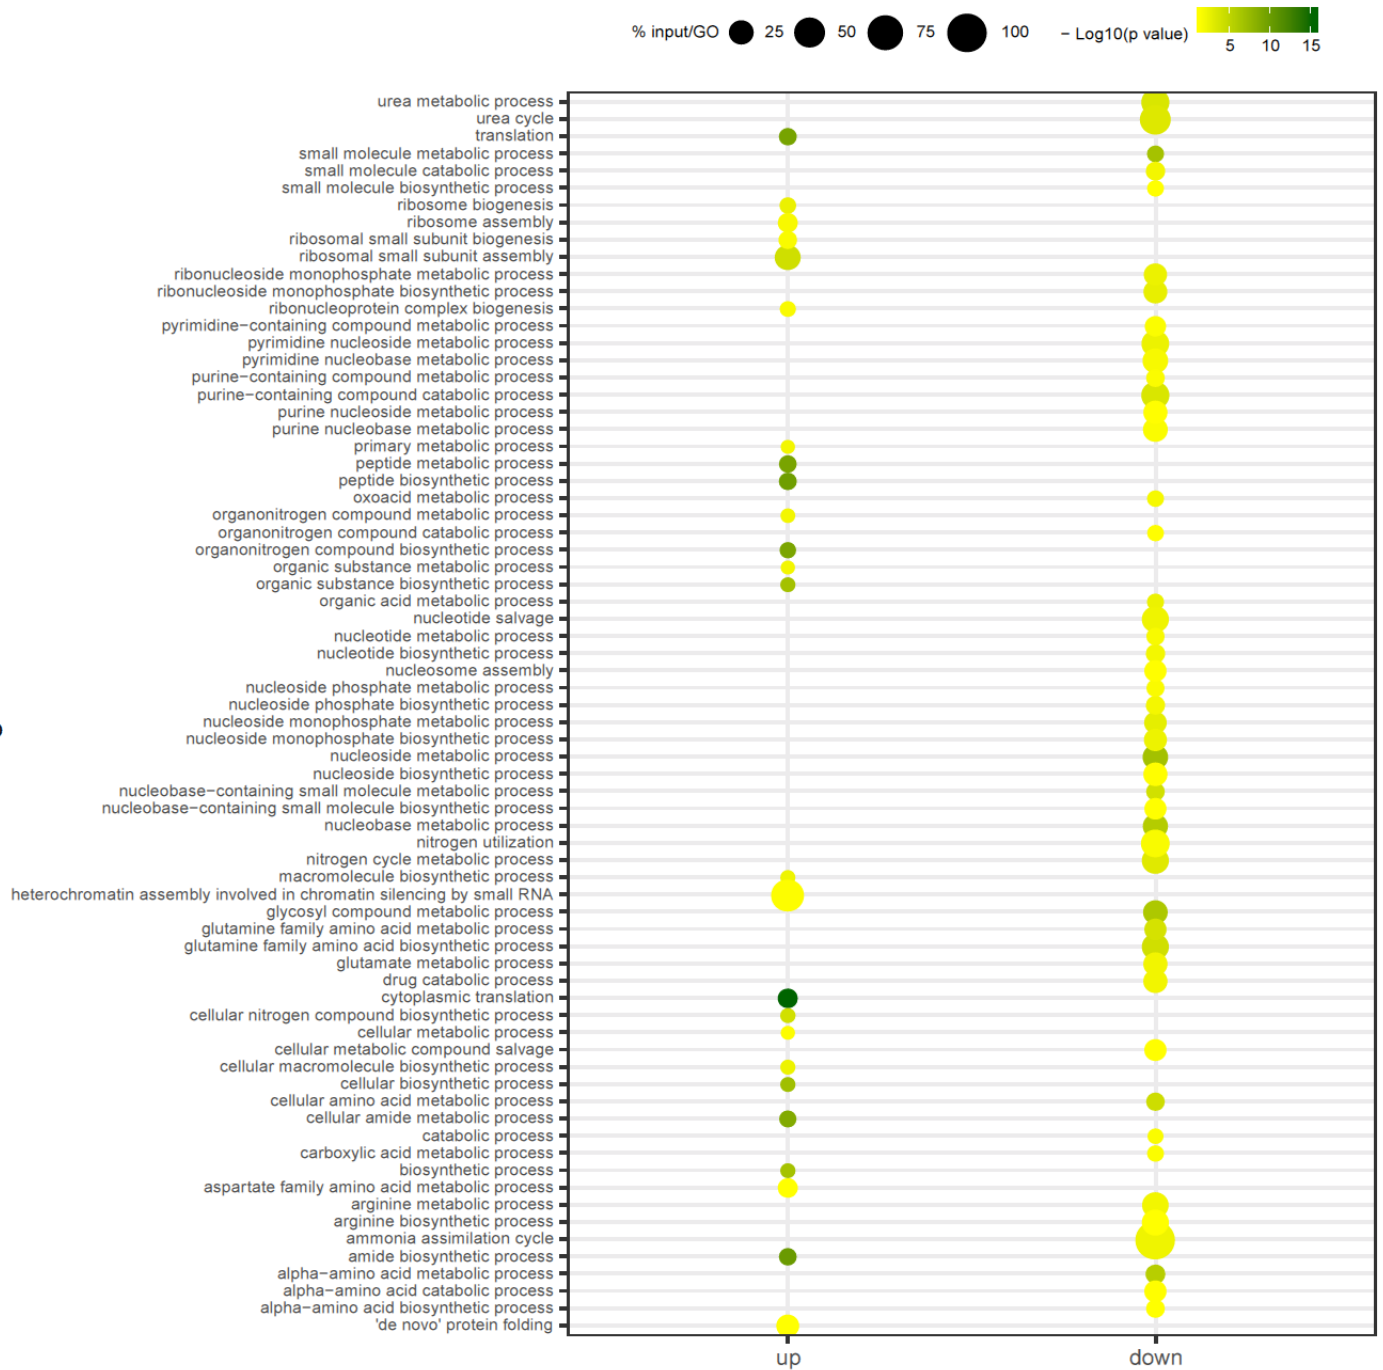

**Figure S3. Functional enrichments among differentially expressed genes, Related to Figure 3.**

Visualization of all GO Biological Process categories enriched among the 108 genes that are repressed (down) and the 90 genes that are induced (up). Gene enrichment analysis was done using g:profiler (<https://academic.oup.com/nar/advance-article/doi/10.1093/nar/gkz369/5486750>). Results were plotted using a custom R script. Colors represent  $-\log_{10}$  p values for the GO term enrichments. The size of the bubbles represents the ratio between the number of genes in the gene list and the total number of genes in the GO category (in percentage); only terms with p values  $<0.05$  are represented.



GO: Biological Process

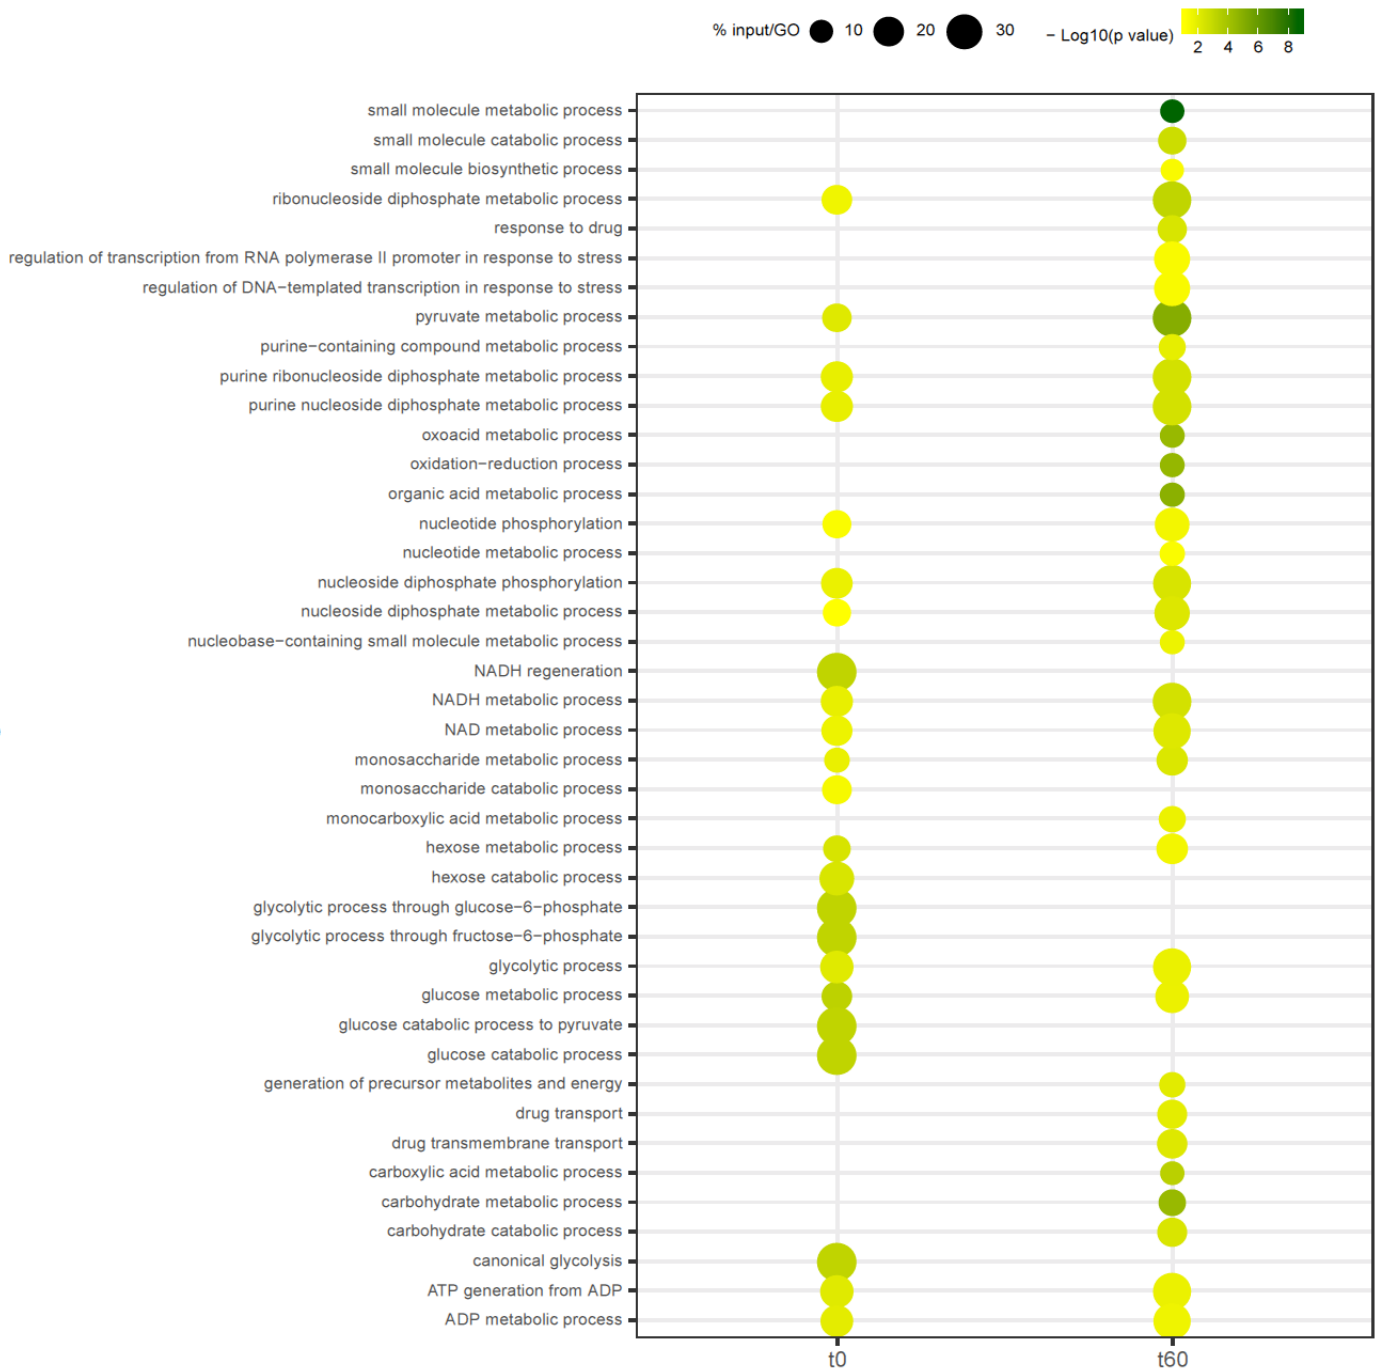

**Figure S4. Functional enrichments among Gaf1-target genes, Related to Figure 4.**

Visualization of all GO Biological Process categories enriched among the 245 protein-coding genes whose promoters are bound by Gaf1 after 60 min of Torin1 treatment. See Figure S3 for details.

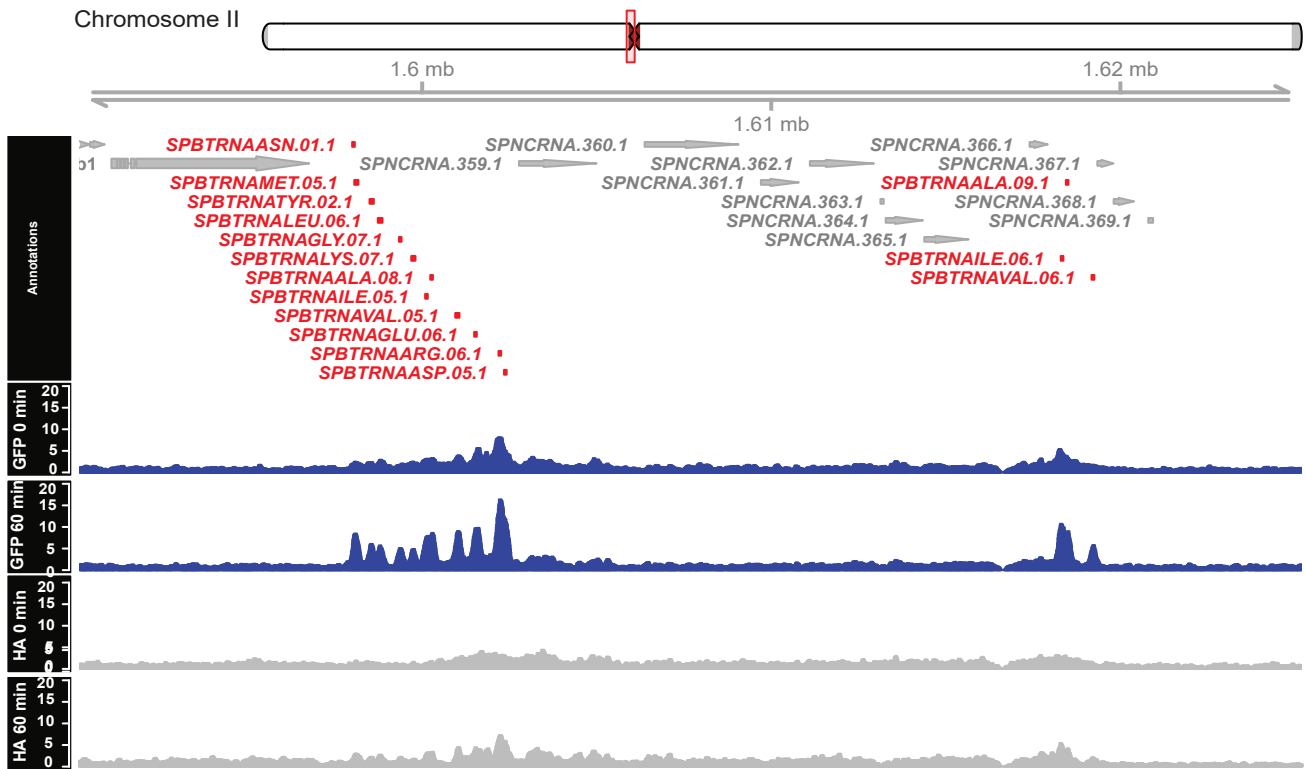

**Figure S5. Gaf1 binding at tRNA genes, Related to Figure 4C.**

Gaf1 binding peaks within Chromosome II region containing clustered tRNA genes (marked in red). Binding profiles are shown for cells before (0 min) and 60 min after treatment with Torin 1 as indicated. Signals from experimental IPs (GFP) are shown in blue, while control IPs (HA) are shown in grey.

**Table S1. Torin1-resistant mutants, Related to Figure 1.**

List of the 19 mutants that show resistance to Torin1. Mutants with black fonts have previously been shown to be resistant to Torin1. Mutants with red fonts are first reported as Torin1-resistant in this study.

| SYSTEMATIC ID       | GENE NAME    | PRODUCT DESCRIPTION                                            |
|---------------------|--------------|----------------------------------------------------------------|
| <i>SPAC21E11.04</i> | <i>aca1</i>  | L-azetidine-2-carboxylic acid acetyltransferase Aca1           |
| <i>SPAC17G6.05c</i> | <i>bro1</i>  | BRO1 domain protein Bro1 (predicted)                           |
| <i>SPBC13G1.12</i>  | <i>did2</i>  | ESCRT III complex subunit Did2 (predicted)                     |
| <i>SPAC4F8.01</i>   | <i>did4</i>  | ESCRT III complex subunit Did4                                 |
| <i>SPCC1902.01</i>  | <i>gaf1</i>  | transcription factor Gaf1                                      |
| <i>SPBC1D7.01</i>   | <i>gim6</i>  | prefoldin subunit 1 (predicted)                                |
| <i>SPBC25B2.04c</i> | <i>mtg1</i>  | mitochondrial translation factor (GTPase) Mtg1 (predicted)     |
| <i>SPBP35G2.11c</i> | <i>nbr1</i>  | cargo receptor for selective autophagy pathway                 |
| <i>SPAC17G6.08</i>  | <i>pep7</i>  | prevacuole/endosomal FYVE tethering component Pep7 (predicted) |
| <i>SPAC19B12.10</i> | <i>sst2</i>  | human AMSH/STAMBP protein homolog, ubiquitin specific-protease |
| <i>SPBP18G5.03</i>  | <i>toc1</i>  | Tor complex Tor2 interacting protein 1                         |
| <i>SPAC11E3.04c</i> | <i>ubc13</i> | ubiquitin conjugating enzyme E2 Ubc13                          |
| <i>SPBC215.14c</i>  | <i>vps20</i> | ESCRT III complex subunit Vps20                                |
| <i>SPAC1B3.07c</i>  | <i>vps28</i> | ESCRT I complex subunit Vps28                                  |
| <i>SPCC364.05</i>   | <i>vps3</i>  | CORVET complex subunit, GTPase regulator Vps3 (predicted)      |
| <i>SPAC1142.07c</i> | <i>vps32</i> | ESCRT III complex subunit Vps32                                |
| <i>SPAC17A2.06c</i> | <i>vps8</i>  | CORVET complex WD repeat Vps8 (predicted)                      |
| <i>SPAC11D3.15</i>  |              | 5-oxoprolinase (ATP-hydrolyzing) (predicted)                   |
| <i>SPBC25B2.03</i>  |              | zf-C3HC4 type zinc finger                                      |
